# Supplementary material
Source: PubMed Central journal article supplement (PMC2785169)
Supplement: supp_M109.052910_jbc.M109.052910-1.pdf [file supp_M109.052910_jbc.M109.052910-1.pdf]

**A Double Tyrosine Motif in the Cardiac Sodium Channel Domain III-IV Linker  
Couples Calcium Dependent Calmodulin Binding to Inactivation Gating**

Maen F. Sarhan, Filip Van Petegem and Christopher A. Ahern

Supplementary Figures S1 and S2

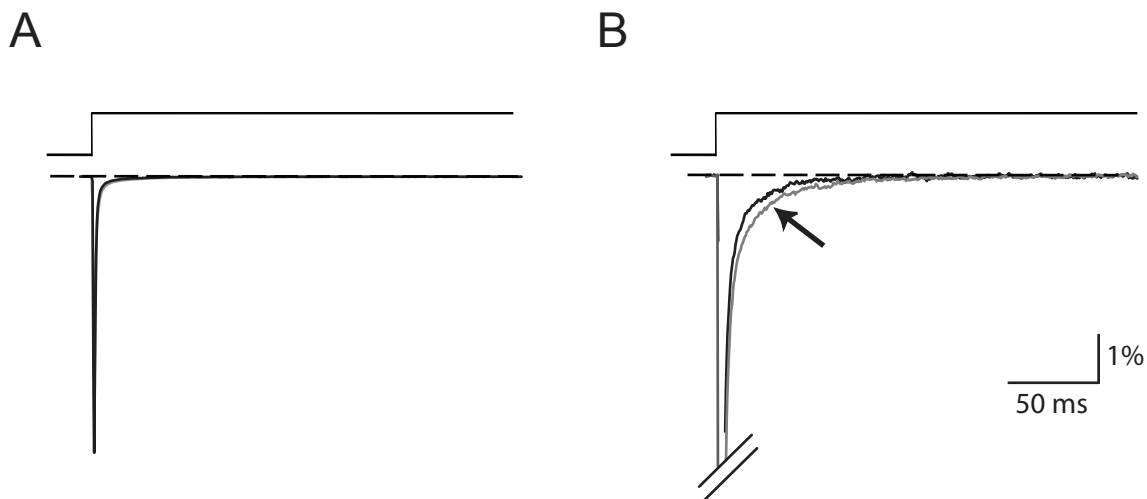

**Supplementary Figure S1. Effect of Intracellular Calcium on the Late Sodium Current.**

A, normalized and superimposed sodium current traces recorded in the presence of a '0' calcium pipette containing 20 mM BAPTA or 10 μM calcium in response to a 400 msec depolarizing pulse from -140 mV to -20 mV. B, enhanced scale of the traces in panel A shows that sodium currents fully inactivate with or without calcium, where the arrow indicates the 0 μM calcium trace. Data are representative of 4 cells under each condition with averages of 0.24%  $\pm$  0.11 vs. 0.18%  $\pm$  0.9 for 10 μM free calcium or 20 mM BAPTA, respectively.

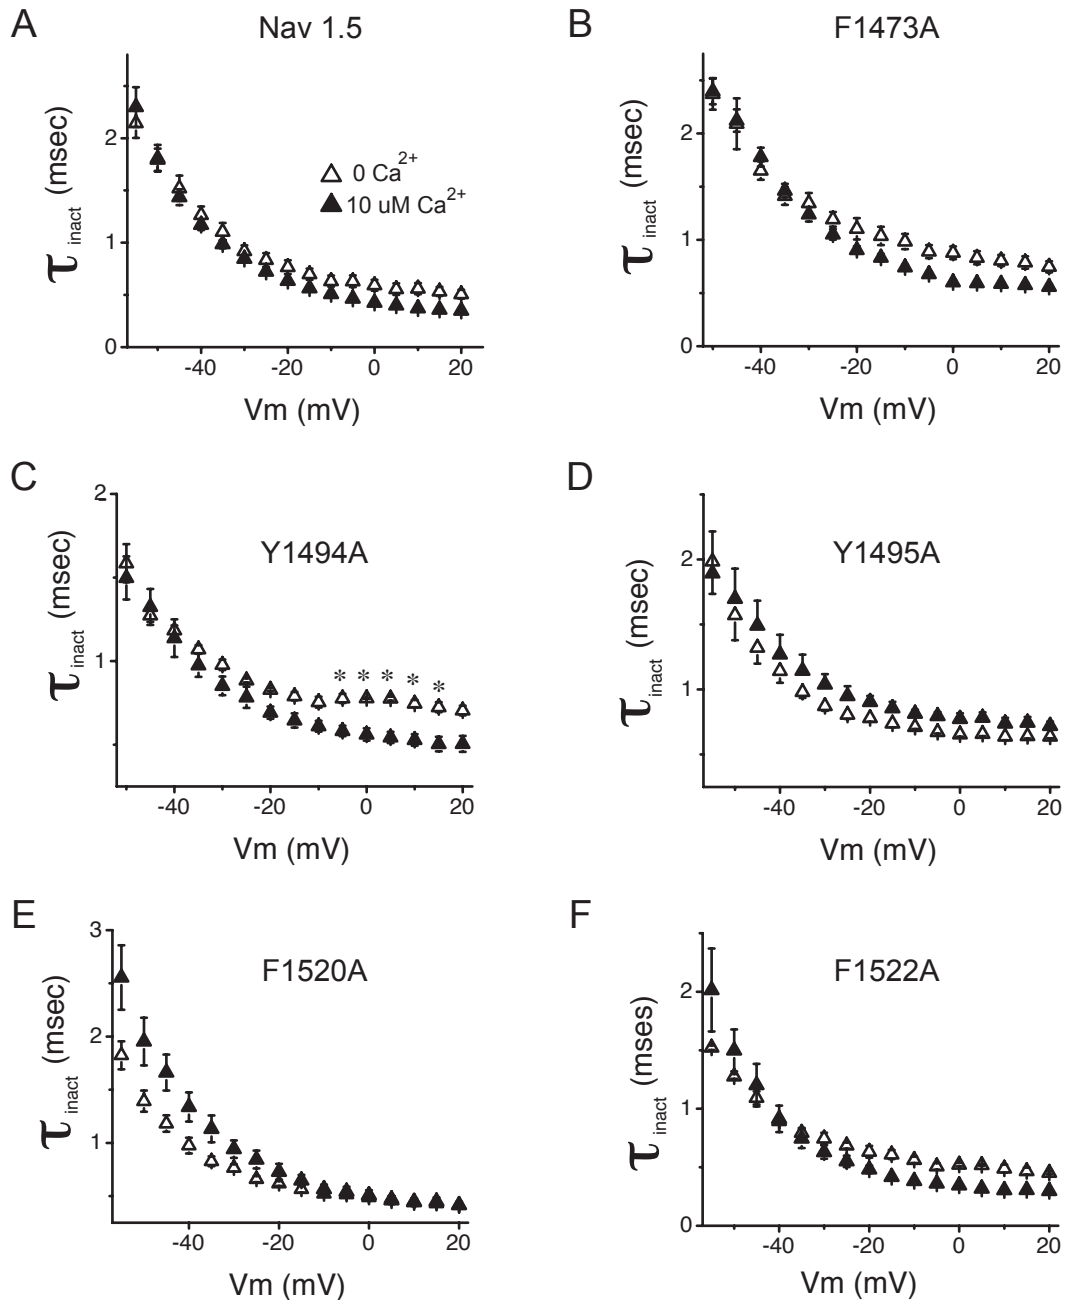

**Supplementary Figure S2. Free Calcium Modestly Effects Cardiac Sodium Channel Inactivation Kinetics.** A-F, Time course of fast inactivation from currents produced by a depolarization from -140 mV to the indicated voltage was fit with a single exponential. Although currents recorded from cells in the presence of 10  $\mu M$  calcium showed mildly faster inactivation, these differences were insignificant ( $P > 0.005$ ) at all voltages, with the exception of the voltages indicated in panel C for the Y1494A mutant.
